# Supplementary material
Source: ML conference proceedings conference paper supplement (https://openaccess.thecvf.com/content/CVPR2022/html/Joseph_Energy-Based_Latent_Aligner_CVPR_2022_paper.html)
Supplement: Supplementary file 3 [file Joseph_Energy-Based_Latent_Aligner_CVPR_2022_supplemental.zip]

Archive with 14 entries (13 files):
- 08375-supp/
- __MACOSX/._08375-supp
- 08375-supp/.DS_Store
- __MACOSX/08375-supp/._.DS_Store
- 08375-supp/supplementary.pdf
- __MACOSX/08375-supp/._supplementary.pdf
- 08375-supp/ELI_512.ipynb
- __MACOSX/08375-supp/._ELI_512.ipynb
- 08375-supp/ELI.ipynb
- __MACOSX/08375-supp/._ELI.ipynb
- 08375-supp/README.txt
- __MACOSX/08375-supp/._README.txt
- 08375-supp/latents.mp4
- __MACOSX/08375-supp/._latents.mp4
