# Supplementary material
Source: ML conference proceedings conference paper supplement (https://openaccess.thecvf.com/content/CVPR2022/html/Joseph_Energy-Based_Latent_Aligner_CVPR_2022_paper.html)
Supplement: Supplementary file 3 [file Joseph_Energy-Based_Latent_Aligner_CVPR_2022_supplemental.zip › 08375-supp/README.txt]

This folder includes the following files:

1) supplementary.pdf	: We add more details about ELI in this file.

2) ELI.ipynb		: This Jupyter Notebook has the code to replicate the MNIST experiments in Section 3.3. Size of latent dimension is 32. 

3) ELI_512.ipynb	: This Jupyter Notebook has the code to replicate the MNIST experiments in Section 3.3. Size of latent dimension is 512. 

4) latents.mp4		: This video shows how latent representation are adapted while the EBM is being learned. Please refer to Section S1 in supplementary.pdf for more details  (Kindly watch latents.mp4 in full-screen).
